# Supplementary material for: Long-Term Occurrence and Fate of Microplastics in WWTPs: A Case Study in Southwest Europe
Source: MDPI journal article supplement (doi:10.3390/app12042133), 2022-02-18
Supplement: s1 [file s1]

## Supplementary Material

# Long-Term Occurrence and Fate of Microplastics in WWTPs: A Case Study in Southwest Europe:

Andrea Menéndez-Manjón<sup>1</sup>, Reyes Martínez-Díez<sup>1</sup>, Daniel Sol<sup>1</sup>, Amanda Laca<sup>1</sup>, Adriana Laca<sup>1,\*</sup>, Amador Rancano<sup>2</sup> and Mario Díaz<sup>1</sup>

<sup>1</sup> Department of Chemical and Environmental Engineering, University of Oviedo, C/Julián Clavería s/n, 33006 Oviedo, Spain; andreamanjon95@gmail.com (A.M.-M.); reyes.m.d@hotmail.com (R.M.-D.); dsolsan91@gmail.com (D.S.); lacaamanda@uniovi.es (A.L.); mariodiaz@uniovi.es (M.D.)

<sup>2</sup> ACCIONA Agua S.A., 28108 Alcobendas, Spain; amador.rancano.perez@acciona.com

\* Correspondence: lacaadriana@uniovi.es; Tel.: +34-985-10-29-74

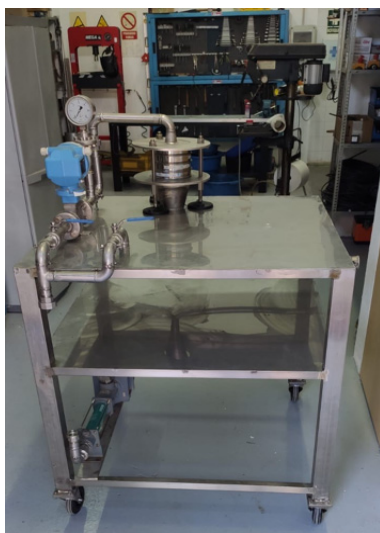

**Figure S1.** Device employed for wastewater sampling. The photograph shows the filtration module, pressure indicator and flow meter as part of the device.

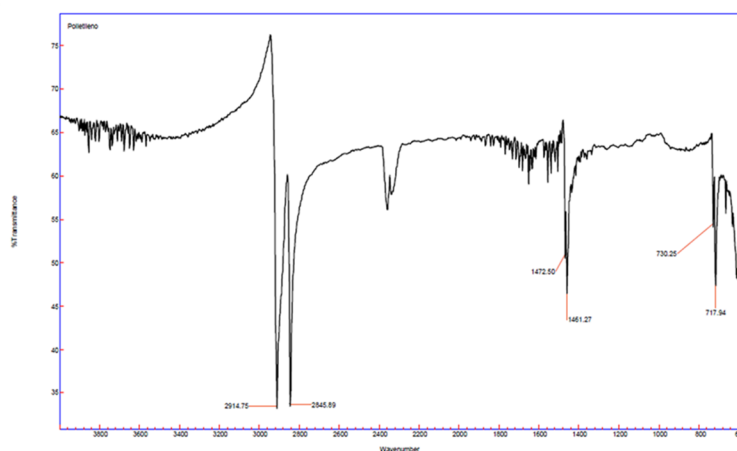

(a)

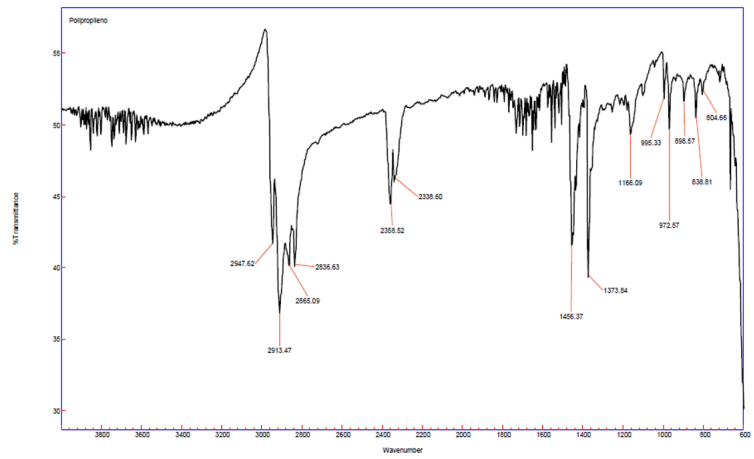

(b)

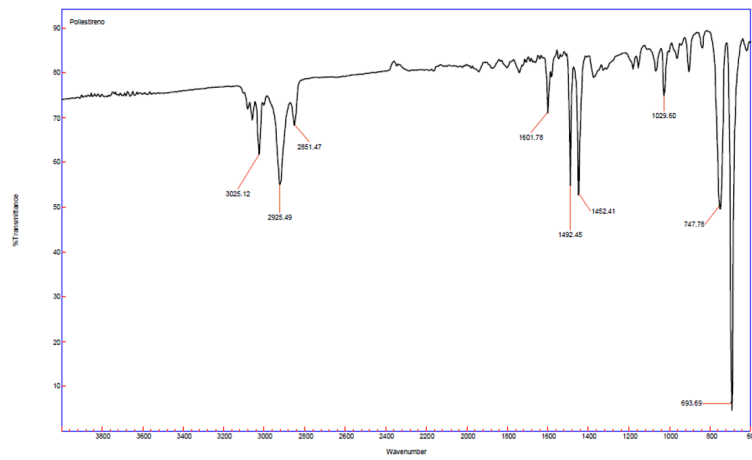

(c)

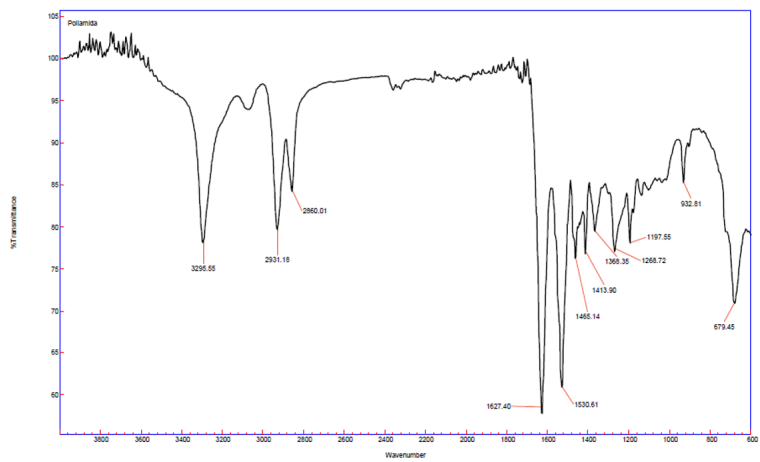

(d)

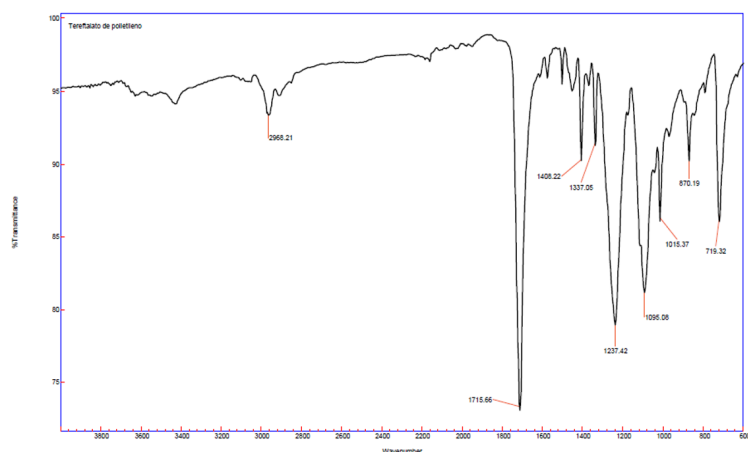

(e)

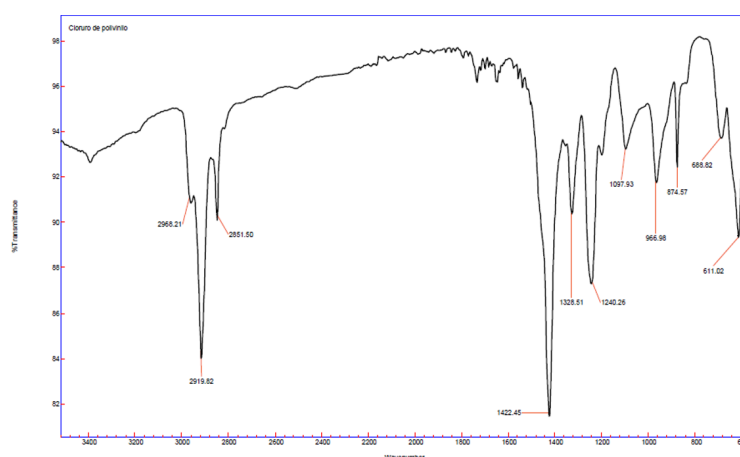

(f)

**Figure S2.** (a) Example of FTIR spectra registered for polyethylene (PE) obtained from the analysis of a black fibre recovered from the secondary effluent sample of July. (b) Example of FTIR spectra registered for polypropylene (PP) obtained from the analysis of a white fragment recovered from influent sample of August. (c) Example of FTIR spectra registered for polystyrene (PS) obtained from the analysis of a red fibre recovered from the influent sample of September. (d) Example of FTIR spectra registered for polyamide (PA) obtained from the analysis of a white foam recovered from the secondary effluent sample of October. (e) Example of FTIR spectra registered for polyethylene terephthalate (PET) obtained from the analysis of a white fragment recovered from the final effluent sample of March. (f) Example of FTIR spectra registered for polyvinyl chloride (PVC) obtained from the analysis of a black fragment recovered from the sludge sample of October.

**Table S1.** Volumes of wastewater (L) and amount of sludge (g) sampled during the period of the study.

|      |           | Influent (after Screening) (L) |             |             |             | Secondary Effluent (L) |             |             |             | Final Effluent (L) |             |             |             | Sludge (g) |
|------|-----------|--------------------------------|-------------|-------------|-------------|------------------------|-------------|-------------|-------------|--------------------|-------------|-------------|-------------|------------|
|      |           | 20 $\mu$ m                     | 100 $\mu$ m | 250 $\mu$ m | 500 $\mu$ m | 20 $\mu$ m             | 100 $\mu$ m | 250 $\mu$ m | 500 $\mu$ m | 20 $\mu$ m         | 100 $\mu$ m | 250 $\mu$ m | 500 $\mu$ m |            |
| 2020 | May       | 3                              | 10          | 25          | 25          | 180                    | 270         | 270         | 270         | 290                | 290         | 290         | 290         | 5.8330     |
|      | June      | 6                              | 18          | 88          | 172         | 79                     | 287         | 287         | 287         | 244                | 244         | 244         | 244         | 5.2907     |
|      | July      | 12                             | 28          | 46          | 63          | 187                    | 265         | 265         | 265         | 198                | 272         | 272         | 272         | 5.0503     |
|      | August    | 74                             | 119         | 188         | 222         | 135                    | 319         | 319         | 319         | 274                | 274         | 274         | 274         | 5.1268     |
|      | September | 24                             | 24          | 62          | 62          | 121                    | 258         | 258         | 258         | 280                | 280         | 280         | 280         | 5.4851     |
|      | October   | 85                             | 85          | 85          | 85          | 210                    | 210         | 210         | 210         | 266                | 266         | 266         | 266         | 5.6021     |

|      |          |    |    |     |     |     |     |     |     |     |     |     |     |        |
|------|----------|----|----|-----|-----|-----|-----|-----|-----|-----|-----|-----|-----|--------|
|      | November | 24 | 32 | 54  | 54  | 202 | 202 | 202 | 202 | 258 | 258 | 258 | 258 | 5.1426 |
|      | December | 27 | 42 | 59  | 80  | 276 | 276 | 276 | 276 | 310 | 310 | 310 | 310 | 4.9943 |
| 2021 | January  | 22 | 43 | 58  | 71  | 308 | 308 | 308 | 308 | 320 | 320 | 320 | 320 | 5.3346 |
|      | February | 29 | 42 | 65  | 83  | 221 | 221 | 221 | 221 | 257 | 257 | 257 | 257 | 5.0148 |
|      | March    | 61 | 84 | 125 | 166 | 124 | 254 | 254 | 254 | 280 | 280 | 280 | 280 | 5.4236 |
|      | April    | 35 | 47 | 79  | 98  | 267 | 267 | 267 | 267 | 283 | 283 | 283 | 283 | 5.1160 |

**Table S2.** Size and shape evolution of microplastics after each treatment (influent, secondary effluent and final effluent) and the overall removal efficiency of each type of microplastic.

|       |                       | Influent |           | Secondary Treatment |           |            | Final Effluent |           |            | Overall    |
|-------|-----------------------|----------|-----------|---------------------|-----------|------------|----------------|-----------|------------|------------|
|       |                       | Number   | Abundance | Number              | Abundance | Removal    | Number         | Abundance | Removal    | removal    |
|       |                       | of MPs   | (%)       | of                  | (%)       | efficiency | of             | (%)       | efficiency | efficiency |
|       |                       |          |           | MPs                 |           | (%)        | MPs            |           | (%)        | y (%)      |
| Size  | 20-100 $\mu\text{m}$  | 656      | 19.57     | 403                 | 23.44     | 38.56      | 289            | 23.05     | 28.28      | 55.95      |
|       | 100-250 $\mu\text{m}$ | 832      | 24.82     | 468                 | 27.23     | 43.75      | 325            | 25.92     | 30.55      | 60.94      |
|       | 250-500 $\mu\text{m}$ | 858      | 25.60     | 412                 | 23.97     | 51.98      | 338            | 26.95     | 17.96      | 60.61      |
|       | >500 $\mu\text{m}$    | 1006     | 30.01     | 436                 | 25.36     | 56.66      | 302            | 24.08     | 30.73      | 69.98      |
| Shape | Fibres                | 1161     | 34.20     | 667                 | 36.19     | 42.54      | 508            | 40.32     | 23.83      | 56.24      |
|       | Fragment              | 2163     | 64.88     | 1157                | 63.32     | 46.50      | 712            | 57.28     | 38.46      | 67.08      |
| s     |                       |          |           |                     |           |            |                |           |            |            |

**Table S3.** Relationship between the colours and chemical composition found for each sampling point expressed in percentage.

|                    |     | White | Black | Red   | Blue  | Green | Yellow | Purple |
|--------------------|-----|-------|-------|-------|-------|-------|--------|--------|
| Influent           | PS  | 11.36 | 21.17 | 24.92 | 27.34 | 12.92 | 2.29   | 0      |
|                    | PA  | 15.36 | 11.45 | 11.33 | 7.9   | 32.56 | 21.4   | 0      |
|                    | PE  | 23.45 | 17.67 | 16.5  | 9.58  | 17.17 | 5.8    | 9.83   |
|                    | PP  | 24.18 | 25.25 | 9.42  | 10.34 | 12.25 | 18.56  | 0      |
|                    | PET | 8.45  | 7.41  | 24.67 | 27.69 | 7.08  | 24.7   | 0      |
|                    | PVC | 5.65  | 0     | 1.33  | 0     | 0.58  | 2.27   | 90.17  |
| Secondary effluent | PS  | 18.97 | 9.94  | 20.61 | 10.1  | 13.37 | 27.01  | 0      |
|                    | PA  | 25.33 | 3.69  | 15.65 | 18    | 27    | 10.33  | 0      |
|                    | PE  | 5.1   | 32.17 | 6.78  | 23.48 | 4.46  | 24.98  | 3.03   |

|                |     |       |       |       |       |       |       |       |
|----------------|-----|-------|-------|-------|-------|-------|-------|-------|
| Final effluent | PP  | 38.25 | 10.47 | 9.13  | 1.63  | 10.01 | 30.51 | 0     |
|                | PET | 5     | 21.98 | 27.67 | 20.03 | 19.67 | 5.65  | 0     |
|                | PVC | 14.06 | 9.99  | 2.56  | 0     | 6.72  | 55.78 | 10.89 |
|                | PS  | 8.96  | 13.66 | 22.99 | 28.06 | 10.33 | 16    | 0     |
|                | PA  | 5.27  | 35.56 | 15.43 | 26.09 | 17.65 | 0     | 0     |
|                | PE  | 0.02  | 22.15 | 0.67  | 3.48  | 37.88 | 28.76 | 7.04  |
|                | PP  | 76.04 | 9.11  | 0     | 0     | 0     | 14.85 | 0     |
|                | PET | 0     | 17    | 45.03 | 15.01 | 20.43 | 0     | 2.53  |
|                | PVC | 0     | 0     | 0.56  | 0     | 0     | 35.67 | 63.77 |
|                | PS  | 8.96  | 13.66 | 22.99 | 28.06 | 10.33 | 16    | 0     |
|                | PA  | 5.27  | 35.56 | 15.43 | 26.09 | 17.65 | 0     | 0     |
|                | PE  | 7.02  | 2.52  | 0.78  | 15.69 | 35.03 | 38.96 | 0     |
| Sludge         | PP  | 26.07 | 9.03  | 21.23 | 10.01 | 8.76  | 24.9  | 0     |
|                | PET | 6.78  | 35.97 | 35.44 | 5.04  | 16.77 | 0     | 0     |
|                | PVC | 56.02 | 11.73 | 4.55  | 2.03  | 0     | 25.67 | 0     |

PA, Polyamide; PE, Polyethylene; PET, Polyethylene terephthalate; PP, Polypropylene; PS, Polystyrene; PVC, Polyvinyl chloride.

**Table S4.** Relationship between the shapes and chemical composition found for each sampling point expressed in percentage.

|                    |           | PE    | PP    | PS    | PA    | PET   | PVC   |
|--------------------|-----------|-------|-------|-------|-------|-------|-------|
| Influent           | Fragments | 67.53 | 77.40 | 52.58 | 9.64  | 73.96 | 97.50 |
|                    | Films     | 0     | 0     | 0     | 0     | 1.10  | 2.50  |
|                    | Pellets   | 0     | 0     | 0     | 0     | 0.24  | 0     |
|                    | Fibres    | 32.47 | 22.60 | 44.84 | 90.36 | 24.33 | 0     |
|                    | Foams     | 0     | 0     | 2.58  | 0     | 0.37  | 0     |
| Secondary effluent | Fragments | 63.10 | 78.76 | 41.14 | 1.45  | 80.19 | 90.00 |
|                    | Films     | 0     | 0     | 0     | 0     | 1.38  | 5.00  |
|                    | Pellets   | 0     | 0.14  | 0     | 0     | 0.92  | 5.00  |
|                    | Fibres    | 36.90 | 21.10 | 50.29 | 97.83 | 16.13 | 0     |
|                    | Foams     | 0     | 0     | 8.57  | 0.72  | 1.38  | 0     |
| Final effluent     | Fragments | 54.64 | 70.54 | 32.63 | 2.35  | 66.35 | 100   |
|                    | Films     | 0     | 0     | 0     | 0     | 1.92  | 0     |
|                    | Pellets   | 0.28  | 0.17  | 1.05  | 0     | 2.88  | 0     |
|                    | Fibres    | 40.16 | 21.30 | 46.32 | 97.65 | 18.27 | 0     |
|                    | Foams     | 4.92  | 7.99  | 20    | 0     | 10.58 | 0     |
| Sludge             | Fragments | 60    | 83.33 | 51.85 | 0     | 81.58 | 88.89 |
|                    | Films     | 0     | 0     | 0     | 0     | 2.63  | 11.11 |
|                    | Pellets   | 0     | 0     | 0     | 0     | 0     | 0     |
|                    | Fibres    | 40    | 16.67 | 33.33 | 90    | 10.53 | 0     |
|                    | Foams     | 0     | 0     | 14.82 | 10    | 5.26  | 0     |

PA, Polyamide; PE, Polyethylene; PET, Polyethylene terephthalate; PP, Polypropylene; PS, Polystyrene; PVC, Polyvinyl chloride.

**Table S5.** Summary of the concentrations of microplastics (MPs/L) in the influent, secondary treatment and final effluent during the period of study. Influent and effluent average flow values are also indicated.

| Months |           | Wastewater Line           |                     |                |                                     |                                     |
|--------|-----------|---------------------------|---------------------|----------------|-------------------------------------|-------------------------------------|
|        |           | MPs Concentration (MPs/L) |                     |                | Influent (average flow)<br>(m³/day) | Effluent (average flow)<br>(m³/day) |
|        |           | Influent                  | Secondary treatment | Final Effluent |                                     |                                     |
| 2020   | May       | 23.85                     | 2.36                | 1.16           | 5335                                | 4931                                |
|        | June      | 18.17                     | 2.44                | 1.58           | 4741                                | 4377                                |
|        | July      | 18.45                     | 1.76                | 0.99           | 4981                                | 4328                                |
|        | August    | 16.04                     | 2.26                | 0.77           | 4089                                | 3684                                |
|        | September | 17.49                     | 2.39                | 1.52           | 4803                                | 4235                                |
|        | October   | 14.82                     | 1.89                | 1.26           | 4707                                | 4071                                |
|        | November  | 14.91                     | 1.67                | 1.34           | 4936                                | 4412                                |
|        | December  | 15.62                     | 1.48                | 1.09           | 4672                                | 4448                                |
| 2021   | January   | 11.90                     | 1.36                | 1.31           | 4374                                | 3934                                |
|        | February  | 13.62                     | 1.54                | 0.71           | 4584                                | 3913                                |
|        | March     | 11.44                     | 1.97                | 0.59           | 4510                                | 3865                                |
|        | April     | 17.12                     | 1.65                | 1.26           | 5770                                | 5159                                |

**Table S6.** Summary of the concentrations of microplastics (MPs/g) in dehydrated sludge during the period of study. Average mass flow values are also indicated.

| Months |           | Sludge Line                                                 |                                                |
|--------|-----------|-------------------------------------------------------------|------------------------------------------------|
|        |           | MP concentration in dehydrated<br>sludge (MPs/g dry weight) | Average mass flow of sludge (kg<br>dry weight) |
| 2020   | May       | 39.35                                                       | 3095                                           |
|        | June      | 29.81                                                       | 2421                                           |
|        | July      | 29.57                                                       | 2452                                           |
|        | August    | 36.05                                                       | 2667                                           |
|        | September | 28.49                                                       | 2097                                           |
|        | October   | 22.26                                                       | 1764                                           |
|        | November  | 19.44                                                       | 3262                                           |
|        | December  | 22.25                                                       | 3973                                           |
| 2021   | January   | 11.99                                                       | 3976                                           |
|        | February  | 16.54                                                       | 1994                                           |
|        | March     | 18.88                                                       | 3544                                           |
|        | April     | 13.86                                                       | 2701                                           |
